# Supplementary material for: Odor Profile of Four Cultivated and Freeze-Dried Edible Mushrooms by Using Sensory Panel, Electronic Nose and GC-MS
Source: MDPI journal article supplement (doi:10.3390/jof8090953), 2022-09-11
Supplement: s1 [file s1]

## SUPPLEMENTARY MATERIAL

Article

### Odor Profile of Four Cultivated and Freeze-dried Edible Mushrooms by Using Sensory Panel, Electronic Nose and GC-MS

Inmaculada Gómez <sup>1</sup>; Rebeca Lavega González <sup>2</sup>; Eva Tejedor-Calvo <sup>3,4</sup>;  
Margarita Pérez Clavijo <sup>2</sup>; Jaime Carrasco <sup>2,5,\*</sup>

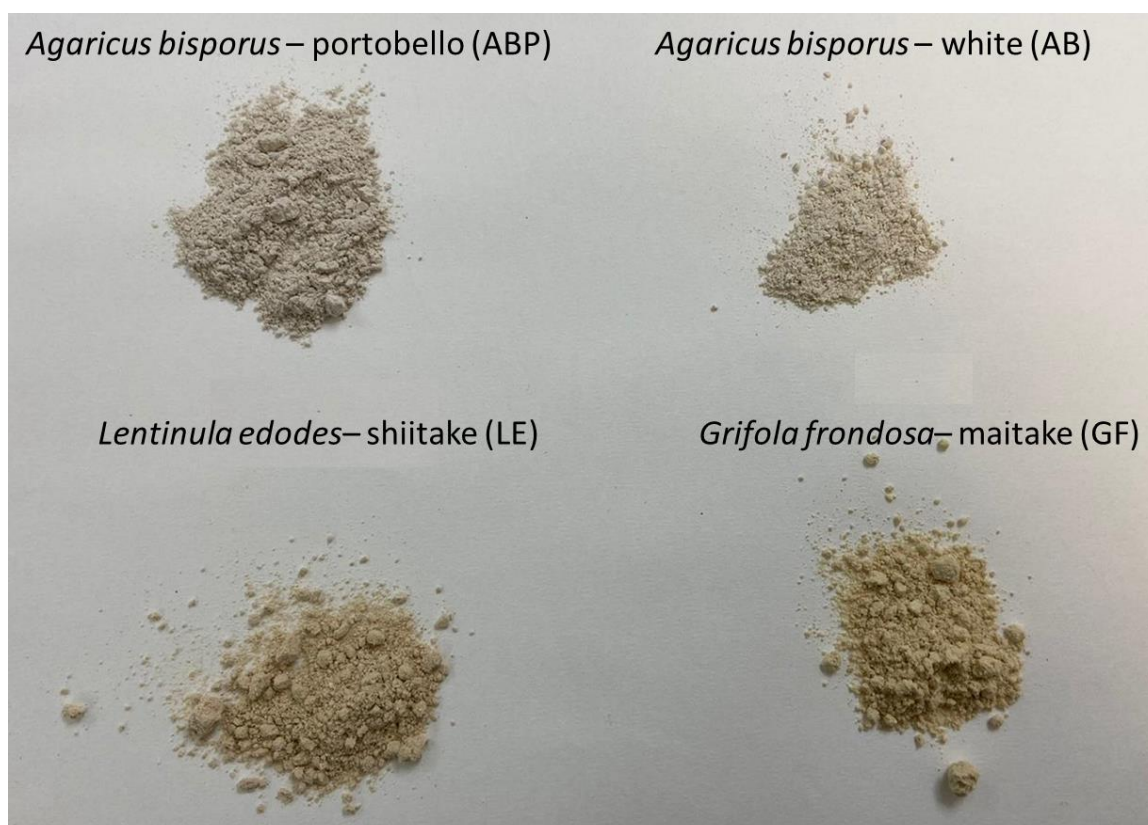

Figure S1. Freeze-dried samples obtained from cultivated mushroom and employed in the analysis.

Table S1. Percentage of the most abundant VOCs detected in the freeze-dried samples by the optimised method based in the SPME fibre extraction and GC-MS analysis.

| VOC <sup>1</sup>                             | CAS <sup>2</sup> | ABP <sup>3</sup> | AB    | LE    | GF    |
|----------------------------------------------|------------------|------------------|-------|-------|-------|
| 1-butanol,2-methyl                           | 137-32-6         | 0.50             | 1.04  | 2.34  | 0.71  |
| 1-butanol,3-methyl                           | 123-51-3         | 0.58             | 0.51  | 3.25  | 3.43  |
| 1-dodecene                                   | 112-41-4         | 0.58             | 0.69  | *n.d. | n.d.  |
| 1-hexenol                                    | 111-27-3         | 27.71            | 23.33 | 7.93  | 3.48  |
| 1-octen-3-ol                                 | 3391-86-4        | 6.30             | 6.76  | 2.27  | 4.40  |
| 1-octen-3-one                                | 4312-99-6        | 3.28             | 1.42  | 1.46  | 3.31  |
| 1-pentanol                                   | 71-41-0          | 3.62             | 3.81  | 3.78  | 0.87  |
| 2,3-butadienol                               | 513-85-9         | n.d.             | n.d.  | 6.12  | n.d.  |
| 2-heptanone                                  | 110-43-0         | 2.43             | 2.50  | 1.76  | 2.86  |
| 2-octenal-2-butyl                            | 13019-16-4       | 0.58             | 0.53  | 1.17  | 0.88  |
| 2-pentylfuran                                | 3777-69-3        | n.d.             | 4.86  | 1.14  | 7.40  |
| 2-propanone                                  | 67-64-1          | 2.07             | 3.22  | 1.52  | 1.32  |
| 3-octanol                                    | 598-98-0         | 2.82             | 5.30  | n.d.  | 6.73  |
| 3-octanone                                   | 106-68-3         | 10.99            | 14.72 | n.d.  | 16.35 |
| 3-octen-2-one                                | 1669-44-9        | 3.94             | n.d.  | 1.55  | 3.08  |
| 4-methyloctane                               | 2216-34-4        | 1.58             | 3.06  | 3.82  | 0.79  |
| benzaldehyde                                 | 100-52-7         | 11.96            | 9.34  | 0.81  | 2.88  |
| benzeneacetaldehyde                          | 122-78-1         | n.d.             | n.d.  | 0.56  | 0.75  |
| butanal-2-methyl                             | 96-17-3          | 1.30             | 1.30  | 4.75  | 6.17  |
| butanal-3-methyl                             | 590-86-3         | 1.84             | 1.69  | 13.85 | 0.15  |
| dimethylsulfone                              | 67-71-0          | 0.13             | 0.13  | 1.01  | 0.80  |
| dodecane                                     | 112-40-3         | 1.21             | 1.58  | 0.79  | 1.84  |
| gamma-caprolactone<br>(=gamma-hexalactone)   | 695-06-07        | n.d.             | n.d.  | 4.73  | 4.31  |
| gamma-nonolactone                            | 104-61-0         | 0.18             | 0.23  | 5.30  | 0.90  |
| gamma-valerolactone<br>(=gamma-pentalactone) | 108-29-2         | n.d.             | n.d.  | 2.84  | 2.07  |
| hexanal                                      | 66-25-1          | 12.41            | 11.42 | 11.51 | 15.63 |
| l-camphor                                    | 76-22-2          | n.d.             | n.d.  | 1.17  | n.d.  |
| limonene                                     | 138-86-3         | 0.71             | 0.87  | 4.27  | 1.17  |
| linalool                                     | 78-70-6          | n.d.             | n.d.  | n.d.  | 5.44  |
| octane                                       | 111-65-9         | n.d.             | n.d.  | 2.62  | n.d.  |
| pentanal                                     | 110-62-3         | 2.57             | 1.71  | 3.64  | 2.27  |
| propanol                                     | 71-23-8          | 0.70             | n.d.  | 4.03  | n.d.  |

<sup>1</sup>VOC: Volatile Organic Compound; <sup>2</sup>CAS: Number assigned to every volatile compound (chemical) detected and quantified; <sup>3</sup>ABP: *Agaricus bisporus* spp. *brunnescens*; AB: *Agaricus bisporus* spp. *bisporus*; LE: *Lentinula edodes*; GF: *Grifola frondosa*; \* n.d.: not detected.
